# Supplementary material
Source: PubMed Central journal article supplement (PMC4978124)
Supplement: NIHMS763530-supplement-supp_guide.pdf [file NIHMS763530-supplement-supp_guide.pdf]

## SI Guide

Supplementary Information Figure 1. Uncropped TLC scans

Supplementary Information Data Table 1. Primers used in this study
