# Supplementary material
Source: PubMed Central journal article supplement (PMC4978124)
Supplement: NIHMS763530-supplement-supp_table1.pdf [file NIHMS763530-supplement-supp_table1.pdf]

**Supplementary Information Data Table 1. Primers used in this study**

|                                                  |              |                                              |
|--------------------------------------------------|--------------|----------------------------------------------|
| Construction of His-BACOVA_04502                 | forward      | GGCGGGATCCATGAAGATAAATAAAATTCCTTAATAAGCGG    |
|                                                  | reverse      | CTAGACGCGTTATATTACATTATCTAAGCGCTAAGAAATAGATC |
| Construction of His-BACOVA_04503                 | forward      | CTTAGGATCCCTTTCTTAGCGCTTAGATAATGTAATATATTC   |
|                                                  | reverse      | AGTAGGATCCCTTCTACTATGCTCACCTTATCAGATGA       |
| Construction of <i>B. thetaiotaomicron</i> Δ3698 | L flank Forw | GACTGGATCCCTAGGTTCTATGCTGGATACCGACT          |
|                                                  | L flank Rev  | GATAACGCGTGCATTGACAACCACAAAAGAGATA           |
|                                                  | R flank Forw | CACCACGCGTAATACAGACAGCGACAGTTACACC           |
|                                                  | R flank Rev  | TTGAGGATCCATAAGAAATATCCCGATTTCGTTGA          |
|                                                  | Screen forw  | AATGTATATCTGATGGGCGATACC                     |
|                                                  | Screen rev   | GATAGAAACCGGAAAAAGTCAAGA                     |
|                                                  | Int scr forw | TACTACTGGACTGGAGCAACG                        |
|                                                  | Int scr rev  | CAGTCGGTGCAGAAATGAGA                         |
| Construction of <i>B. thetaiotaomicron</i> Δ1760 | L flank Forw | TTGGGGATCCACTTACAACGGTAACCTGAATTGG           |
|                                                  | L flank Rev  | GGTAGAATTCCTCAGTGCGGTAAATGCTATAGGTA          |
|                                                  | R flank Forw | GCACGAATTCGTATCAGACGTTTCAGGTAAGCAC           |
|                                                  | R flank Rev  | CTGAGGATCCCTGAGTAACACGGTTTTCTTCTGA           |
|                                                  | Screen forw  | CTGCCGACTACTATCACTACAACG                     |
|                                                  | Screen rev   | GAAAGGTCTACCGGAACAAAAGTAA                    |
| Construction of <i>B. ovatus</i> Δ04502          | L flank Forw | AGTTGAATTCCTTTCTTACCCAGTCAGAACTTGA           |
|                                                  | L flank Rev  | ACTTACGCGTTCGCTTATTAAGAATTTATTTATCTTCA       |
|                                                  | R flank Forw | CTAGACGCGTTATATTACATTATCTAAGCGCTAAGAAATAGATC |
|                                                  | R flank Rev  | CGAGGGATCCCTCCATAGGGAACAATAAAGAGC            |
| Construction of <i>B. ovatus</i> Δ04503          | L flank Forw | ACCGGAATTCGGAACAATTCCAAGTTTTATACCG           |
|                                                  | L flank Rev  | TGCTCCATGGGAACAACACAGACAGAAAGTGCT            |
|                                                  | R flank Forw | TAATCCATGGAAACGCAGGAAGTCTCTAAT               |
|                                                  | R flank Rev  | ATCAGAATTCATCCAAAAATGAGAAAATCATCA            |
| Construction of <i>B. ovatus</i> Δ04502/3        | L flank Forw | ACCGGTCGACGGAACAATTCCAAGTTTTATACCG           |
|                                                  | L flank Rev  | TGCTACGCGTGAACAAACACAGACAGAAAGTGCT           |
|                                                  | R flank Forw | GAAGACGCGTAAGATAATATTGTGCTCATGACGAAAG        |
|                                                  | R flank Rev  | CGGCGTCGACACGGTATTACTAACTTACCACGGC           |
|                                                  | Screen forw  | GCTCGCAAATTTAATTAACCGTAT                     |
|                                                  | Screen rev   | TTCTATTTGTCCACCATGCAAAGAT                    |
| Construction of <i>B. ovatus</i> Δ04504          | L flank Forw | TACTGGATCCAAGAGGTGGCTGACATACCTACT            |
|                                                  | L flank Rev  | CTGCGAATTCAAATAGTGCCATCACACCTACTGC           |
|                                                  | R flank Forw | TCTCGAATTCCTCCAATGCACAATATAACTTCTC           |
|                                                  | R flank Rev  | TCTTGGATCCAGGAAGCTTTTTTCATCATCATCTT          |
| Construction of <i>B. ovatus</i> Δ04505          | L flank Forw | ATTGGAATTCCTCTAAATGGGGAAATATGCATTG           |
|                                                  | L flank Rev  | CGCTACGCGTAAAAGTAAACAGGAAACAAAACGCT          |
|                                                  | R flank Forw | GGTACGCGTAACTCGTACCTATACATTCGGTC             |
|                                                  | R flank Rev  | ATCAGAATTCATTAATATTCTCGCCACCAATCA            |
| Construction of <i>B. ovatus</i> Δ04504/5        | L flank Forw | ATTGGGATCCCTCTAAATGGGGAAATATGCATTG           |
|                                                  | L flank Rev  | CGCTGAATTCGAAAGTAAACAGGAAACAAAACGCT          |
|                                                  | R flank Forw | TCTCGAATTCCTCCAATGCACAATATAACTTCTC           |
|                                                  | R flank Rev  | TCTTGGATCCAGGAAGCTTTTTTCATCATCATCTT          |
| Clone BACOVA_04502 native                        | forward      | TATTGGATCCAACCTCCTCAACATACACCATTATT          |
|                                                  | reverse      | TCAAGGATCCAGTTACACCTATCACTTTTGTTCAA          |
| Clone BACOVA_04503 native                        | forward      | AGTTGGATCCAGAATCCCGGATACGGTAAAGTT            |
|                                                  | reverse      | GAAAGGATCCCTTAATAATGGTGTATGTTGAGGAGG         |
| Clone BACOVA_04502/3 native                      | forward      | TGAAGGATCCAGAATCCCGGATACGGTAAAGT             |
|                                                  | reverse      | GCGAGGATCCAAAATGTTACCGATCTATTTCTTAGCG        |
| Clone BACOVA_04504 native                        | forward      | CAGAGGTACCTGGTTTTTAATTTTTATCCTAAATACAGA      |
|                                                  | reverse      | TTACAGGTACCTGCTAAGCAAATATCTTTTTATTTTCA       |
| Clone BACOVA_04505 native                        | forward      | TCGTGGATCCCTGCATCATCGATATAGTAAAATTCGT        |
|                                                  | reverse      | TAGGGGATCCCTTCAATTTTCATAATGTTCTGTATTTAG      |
| Clone BACOVA_04504/5 native                      | forward      | TCGTGGTACCTGCATCATCGATATAGTAAAATTCGT         |
|                                                  | reverse      | TTCAGGTACCTGCTAAGCAAATATCTTTTTATTTTCA        |

Restriction sites are underlined
