# Supplementary material
Source: PubMed Central journal article supplement (PMC4978124)

Fig. 2b

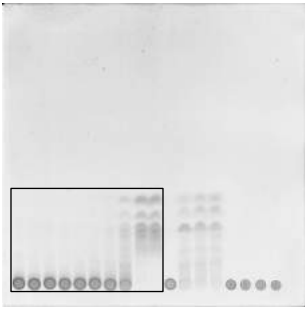

Fig. 2d, left

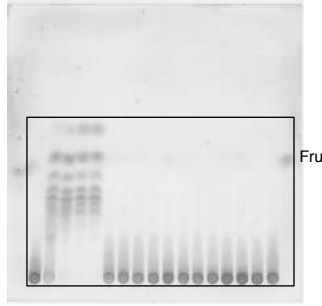

Fig. 2d, right

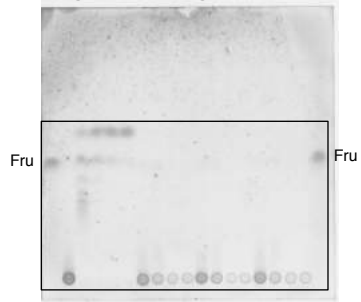

Ex. Data Fig. 1e

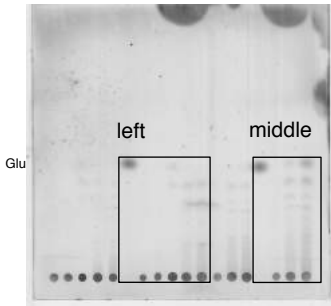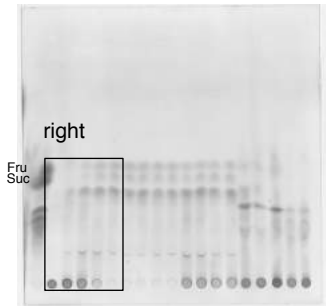

Ex. Data Fig. 2b

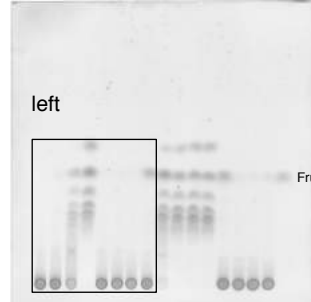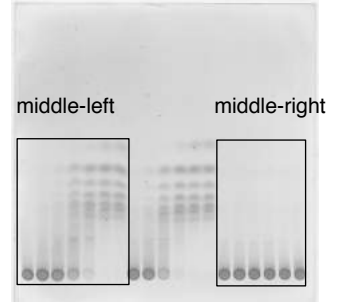

Ex. Data Fig. 2c

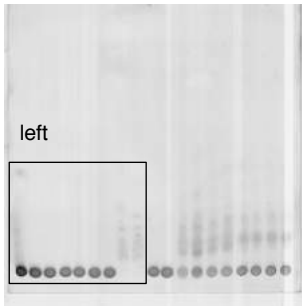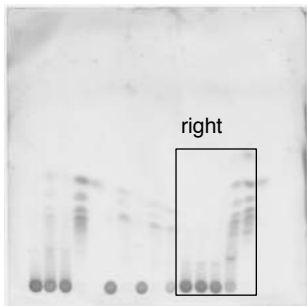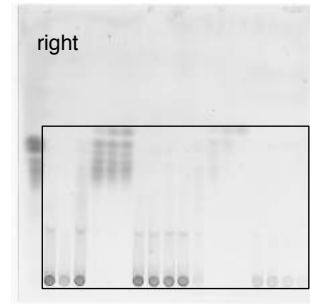

Ex. Data Fig. 4c

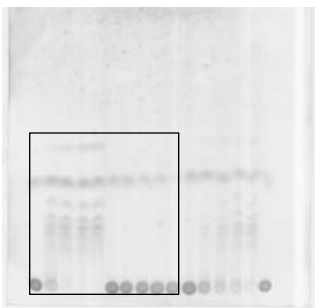

Ex. Data Fig. 5e

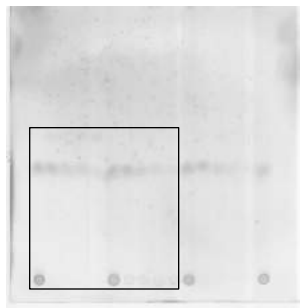

Supplement: NIHMS763530-supplement-supp_figure1.pdf [file NIHMS763530-supplement-supp_figure1.pdf]
